# Supplementary material for: Risk Communication Distributed among Migrant Workers during the COVID-19 Crisis in Thailand: Analysis on Structural and Networking Gaps
Source: MDPI journal article supplement (doi:10.3390/tropicalmed7100296), 2022-10-12
Supplement: s1 [file s1]

Supplementary file

Table S1 Social network analysis in Chumthong migrant community, Ranong

| Node ID | Node name          | Age | Gender | Occupation                      | Organisation/<br>Community                      | In-degree | Out-degree | Betweenness-centrality | Closeness-centrality | Average distance to migrant worker |
|---------|--------------------|-----|--------|---------------------------------|-------------------------------------------------|-----------|------------|------------------------|----------------------|------------------------------------|
| 1       | HPH Staff          | 59  | F      | Nurse                           | Health Centre (Pak Nam subdistrict)             | 5         | 7          | 44.0                   | 0.0112               | 2.3                                |
| 2       | DPHO Staff         | 37  | F      | Public Health Technical Officer | District Public Health Office                   | 2         | 15         | 119.8                  | 0.0222               | 2.0                                |
| 3       | PPHO Staff         | 52  | M      | Public Health Technical Officer | Provincial Public Health Office                 | 14        | 11         | 319.7                  | 0.0118               | 1.6                                |
| 4       | VHV                | 42  | F      | Business Owner                  | Pak Nam subdistrict                             | 5         | 12         | 173.3                  | 0.0102               | 2.0                                |
| 5       | NGO Staff          | 42  | F      | Staff                           | World Vision Foundation                         | 1         | 5          | 1.8                    | 0.0106               | 2.4                                |
| 6       | Employer/Colleague | 52  | M      | Manager                         | E&C Frozen Foods Co., Ltd., Pak Nam subdistrict | 5         | 8          | 86.1                   | 0.0114               | 2.0                                |
| 7       | Hospital Staff     | 41  | M      | Staff                           | Ranong Hospital                                 | 2         | 4          | 27.0                   | 0.0769               | 2.2                                |
| 8       | FA Staff           | 36  | F      | Manager                         | Fishery Association                             | 2         | 2          | 2.8                    | 0.0064               | 2.6                                |
| 9       | PLO Staff          | 47  | F      | Staff                           | Provincial Labour Office                        | 0         | 6          | 0                      | 0.0097               | 2.2                                |
| 10      | LG Staff           | 50  | F      | Nurse                           | Town Municipality                               | 0         | 6          | 0                      | 0.0070               | 2.0                                |
| 11      | HPH MHW            | 32  | F      | Migrant Health Worker           | Health Centre (Pak Nam subdistrict)             | 3         | 8          | 3.1                    | 0.0083               | 2.3                                |
| 12      | Migrant 1          | 36  | M      | Fishery                         | Chumthong community                             | 0         | 3          | 0                      | 0.0094               | N/A                                |
| 13      | Migrant 2          | 49  | M      | Fishery                         | Chumthong community                             | 0         | 4          | 0                      | 0.0101               | N/A                                |
| 14      | Migrant 3          | 27  | M      | Fishery                         | Chumthong community                             | 0         | 4          | 0                      | 0.0097               | N/A                                |
| 15      | MHV                | 50  | M      | Seller                          | Chumthong community                             | 11        | 2          | 93.4                   | 0.0094               | 1.6                                |
| 16      | NGO MHW            | 53  | M      | Migrant Health Worker           | World Vision Foundation                         | 5         | 6          | 69.3                   | 0.0108               | 2.1                                |
| 17      | Migrant 4          | 34  | F      | Unemployed                      | Chumthong community                             | 0         | 3          | 0                      | 0.0093               | N/A                                |
| 18      | Migrant 5          | 38  | M      | Fishery                         | Chumthong community                             | 0         | 2          | 0                      | 0.0080               | N/A                                |
| 19      | Migrant 6          | 43  | M      | Fishery                         | Chumthong community                             | 0         | 3          | 0                      | 0.0079               | N/A                                |
| 20      | Migrant 7          | 38  | M      | Fishery                         | Chumthong community                             | 0         | 2          | 0                      | 0.0078               | N/A                                |

|    |                                     |    |   |            |                     |    |   |   |        |     |
|----|-------------------------------------|----|---|------------|---------------------|----|---|---|--------|-----|
| 21 | Migrant 8                           | 48 | F | Unemployed | Chumthong community | 0  | 2 | 0 | 0.0088 | N/A |
| 22 | Migrant 9                           | 36 | F | Unemployed | Chumthong community | 0  | 2 | 0 | 0.0088 | N/A |
| 23 | Migrant 10                          | 44 | M | Fishery    | Chumthong community | 0  | 2 | 0 | 0.0079 | N/A |
| 24 | Migrant 11                          | 44 | M | Fishery    | Chumthong community | 0  | 3 | 0 | 0.0092 | N/A |
| 25 | Migrant 12                          | 36 | F | Fishery    | Chumthong community | 0  | 3 | 0 | 0.0098 | N/A |
| 26 | Migrant 13                          | 36 | F | Seller     | Chumthong community | 0  | 5 | 0 | 0.0097 | N/A |
| 27 | Central MOPH Staff                  | -  | - | -          | -                   | 4  | 0 | 0 | N/A    | 2.3 |
| 28 | Government Staff (Other Sectors)    | -  | - | -          | -                   | 5  | 0 | 0 | N/A    | 2.5 |
| 29 | Community Leader                    | -  | - | -          | -                   | 4  | 0 | 0 | N/A    | 2.6 |
| 30 | Accommodation Owner                 | -  | - | -          | -                   | 2  | 0 | 0 | N/A    | 3.0 |
| 31 | Broadcasting Media (National Media) | -  | - | -          | -                   | 8  | 0 | 0 | N/A    | 2.3 |
| 32 | Broadcasting Media (Local Media)    | -  | - | -          | -                   | 4  | 0 | 0 | N/A    | 2.8 |
| 33 | Broadcasting Media (Unspecified)    | -  | - | -          | -                   | 1  | 0 | 0 | N/A    | 3.2 |
| 34 | Printed Media (National Media)      | -  | - | -          | -                   | 3  | 0 | 0 | N/A    | 2.5 |
| 35 | Printed Media (Local Media )        | -  | - | -          | -                   | 16 | 0 | 0 | N/A    | 1.6 |
| 36 | Online Media (National Media)       | -  | - | -          | -                   | 5  | 0 | 0 | N/A    | 2.3 |
| 37 | Online Media (Local Media)          | -  | - | -          | -                   | 7  | 0 | 0 | N/A    | 2.2 |
| 38 | Online Media (Unspecified)          | -  | - | -          | -                   | 12 | 0 | 0 | N/A    | 1.9 |

|    |                     |   |   |   |   |   |   |   |     |     |
|----|---------------------|---|---|---|---|---|---|---|-----|-----|
| 39 | International Media | - | - | - | - | 1 | 0 | 0 | N/A | 2.8 |
| 40 | Other Channels      | - | - | - | - | 3 | 0 | 0 | N/A | 3.0 |

Note: KIs are node ID 1-26; Female (F); Male (M); Chumthong community, Pak Nam subdistrict

Table S2 Social network analysis in Wat Noi Nang Hong migrant community, Samut Sakhon

| Node ID | Node name             | Age | Gender | Occupation                      | Organisation/<br>Community                      | In-degree | Out-degree | Betweenness-centrality | Closeness-centrality | Average distance to migrant worker |
|---------|-----------------------|-----|--------|---------------------------------|-------------------------------------------------|-----------|------------|------------------------|----------------------|------------------------------------|
| 1       | PPHO staff            | 55  | M      | Public Health Technical Officer | Provincial Public Health Office                 | 7         | 15         | 58.4                   | 0.0098               | 2.0                                |
| 2       | Employer/Colleague 2  | 37  | M      | Construction Employer           | Wat Noi Nang Hong community                     | 7         | 11         | 34.3                   | 0.0099               | 1.5                                |
| 3       | Community Leader2     | 45  | F      | Community Leader                | Wat Noi Nang Hong community                     | 8         | 8          | 17.6                   | 0.0085               | 2.2                                |
| 4       | VHV 2                 | 42  | F      | Housemaid                       | Lang San village                                | 10        | 9          | 19.3                   | 0.0075               | 2.0                                |
| 5       | MHV 2                 | 35  | M      | Factory Worker                  | Wat Noi Nang Hong community                     | 10        | 9          | 99.5                   | 0.0110               | 1.3                                |
| 6       | Hospital MHW          | 27  | F      | Migrant Health Worker           | Samut Sakhon Hospital                           | 7         | 5          | 14.7                   | 0.0067               | 1.5                                |
| 7       | Hospital Staff        | 30  | M      | Public Health Technical Officer | Samut Sakhon Hospital                           | 7         | 9          | 15.7                   | 0.0099               | 1.5                                |
| 8       | DPHO Staff            | 52  | M      | Public Health Technical Officer | District Public Health Office                   | 3         | 3          | 21.6                   | 0.1000               | 2.5                                |
| 9       | NGO Staff             | 28  | M      | Legal Officer                   | Raks Thai Foundation                            | 2         | 6          | 49.1                   | 0.0094               | 2.0                                |
| 10      | HPH Staff             | 30  | F      | Nurse                           | Health Centre (Tar Chin subdistrict)            | 7         | 9          | 59.2                   | 0.0101               | 1.5                                |
| 11      | NGO MHW               | 45  | M      | Migrant Health Worker           | Raks Thai Foundation                            | 3         | 11         | 7.8                    | 0.0086               | 2.2                                |
| 12      | LG Staff              | 25  | F      | Sanitation Technical Officer    | Subdistrict Municipality (Tar Chin subdistrict) | 3         | 13         | 32.4                   | 0.0152               | 2.0                                |
| 13      | Accommodation Owner 2 | 46  | M      | Accommodation Manager           | Wat Noi Nang Hong community                     | 5         | 10         | 3.7                    | 0.0079               | 1.8                                |
| 14      | Migrant 1             | 39  | F      | Fishery                         | Wat Noi Nang Hong community                     | 0         | 9          | 0.0                    | 0.0086               | N/A                                |

|    |                                     |    |   |                |                             |    |   |      |        |     |
|----|-------------------------------------|----|---|----------------|-----------------------------|----|---|------|--------|-----|
| 15 | Migrant 2                           | 37 | F | Factory worker | Wat Noi Nang Hong community | 0  | 6 | 0.0  | 0.0078 | N/A |
| 16 | Migrant 3                           | 47 | M | Factory worker | Wat Noi Nang Hong community | 0  | 4 | 0.0  | 0.0056 | N/A |
| 17 | Migrant 4                           | 35 | F | Factory worker | Wat Noi Nang Hong community | 1  | 5 | 12.7 | 0.0060 | N/A |
| 18 | Migrant 5                           | 29 | F | Factory worker | Wat Noi Nang Hong community | 1  | 8 | 1.5  | 0.0081 | N/A |
| 19 | Migrant 6                           | 35 | F | Unemployed     | Wat Noi Nang Hong community | 1  | 8 | 11.3 | 0.0075 | N/A |
| 20 | Central MOPH Staff                  | -  | - | -              | -                           | 4  | 0 | 0    | N/A    | 2.5 |
| 21 | Government Staff (Other Sectors)    | -  | - | -              | -                           | 3  | 0 | 0    | N/A    | 3.0 |
| 22 | Broadcasting Media (National Media) | -  | - | -              | -                           | 12 | 0 | 0    | N/A    | 1.5 |
| 23 | Broadcasting Media (Local Media)    | -  | - | -              | -                           | 11 | 0 | 0    | N/A    | 1.3 |
| 24 | Broadcasting Media (Unspecified)    | -  | - | -              | -                           | 1  | 0 | 0    | N/A    | 3.5 |
| 25 | Printed Media (National Media)      | -  | - | -              | -                           | 4  | 0 | 0    | N/A    | 2.5 |
| 26 | Printed Media (Local Media)         | -  | - | -              | -                           | 13 | 0 | 0    | N/A    | 1.0 |
| 27 | Printed Media (Unspecified)         | -  | - | -              | -                           | 1  | 0 | 0    | N/A    | 3.0 |
| 28 | Online Media (National Media)       | -  | - | -              | -                           | 8  | 0 | 0    | N/A    | 2.2 |
| 29 | Online Media (Local Media)          | -  | - | -              | -                           | 12 | 0 | 0    | N/A    | 1.2 |

|    |                               |   |   |   |   |   |   |   |     |     |
|----|-------------------------------|---|---|---|---|---|---|---|-----|-----|
| 30 | Online Media<br>(Unspecified) | - | - | - | - | 3 | 0 | 0 | N/A | 2.5 |
| 31 | International<br>Media        | - | - | - | - | 2 | 0 | 0 | N/A | 2.2 |
| 32 | Other Channels                | - | - | - | - | 2 | 0 | 0 | N/A | 2.5 |

Note: KIs are node ID 1-19; Female (F); Male (M); Wat Noi Nang Hong community, Lang San village, Tha Chin subdistrict

Table S3 Social network analysis in Ban Auea Arthorn Tha Chin migrant community, Samut Sakhon

| Node ID | Node name             | Age | Gender | Occupation                      | Organisation/Community                          | In-degree | Out-degree | Betweenness-centrality | Closeness-centrality | Average distance to migrant worker |
|---------|-----------------------|-----|--------|---------------------------------|-------------------------------------------------|-----------|------------|------------------------|----------------------|------------------------------------|
| 1       | PPHO staff            | 55  | M      | Public Health Technical Officer | Provincial Public Health Office                 | 5         | 13         | 41.1                   | 0.0094               | 2                                  |
| 2       | Accommodation Owner 1 | 44  | F      | Accommodation Manager           | Ban Auea Arthorn Tha Chin community             | 6         | 12         | 31.8                   | 0.0094               | 1.7                                |
| 3       | Employer/Colleague 1  | 57  | M      | Factory Employer                | Ban Auea Arthorn Tha Chin community             | 10        | 6          | 22                     | 0.0082               | 1.3                                |
| 4       | Community Leader 1    | 49  | M      | Community leader                | Ban Auea Arthorn Tha Chin community             | 9         | 10         | 49.5                   | 0.0093               | 1.8                                |
| 5       | VHV 1                 | 55  | M      | Housemaid                       | Tha Chin village                                | 10        | 7          | 75.8                   | 0.0081               | 2                                  |
| 6       | MHV 1                 | 37  | F      | Housemaid                       | Ban Auea Arthorn Tha Chin community             | 8         | 6          | 36                     | 0.0072               | 1.7                                |
| 7       | Hospital MHW          | 27  | F      | Migrant Health Worker           | Samut Sakhon Hospital                           | 7         | 5          | 10.2                   | 0.0067               | 1.5                                |
| 8       | Hospital Staff        | 30  | M      | Public Health Technical Officer | Samut Sakhon Hospital                           | 8         | 9          | 50.2                   | 0.0083               | 1.3                                |
| 9       | DPHO Staff            | 52  | M      | Public Health Technical Officer | District Public Health Office                   | 3         | 3          | 22.6                   | 0.1000               | 2.7                                |
| 10      | NGO Staff             | 28  | M      | Legal Officer                   | Raks Thai Foundation                            | 1         | 7          | 0                      | 0.0103               | 2                                  |
| 11      | HPH Staff             | 30  | F      | Nurse                           | Health Centre (Tar Chin subdistrict)            | 4         | 10         | 23.9                   | 0.0088               | 2.2                                |
| 12      | NGO MHW               | 45  | M      | Migrant Health Worker           | Raks Thai Foundation                            | 3         | 10         | 26.3                   | 0.0090               | 2.2                                |
| 13      | LG Staff              | 25  | F      | Sanitation Technical Officer    | Subdistrict Municipality (Tar Chin subdistrict) | 4         | 12         | 102.4                  | 0.0143               | 2                                  |
| 14      | Migrant 1             | 28  | F      | Factory Worker                  | Ban Auea Arthorn Tha Chin community             | 0         | 5          | 0                      | 0.0057               | N/A                                |

|    |                                     |    |   |                     |                                     |    |   |   |        |     |
|----|-------------------------------------|----|---|---------------------|-------------------------------------|----|---|---|--------|-----|
| 15 | Migrant 2                           | 28 | M | Unemployed          | Ban Auea Arthorn Tha Chin community | 0  | 5 | 0 | 0.0064 | N/A |
| 16 | Migrant 3                           | 31 | M | Fishery             | Ban Auea Arthorn Tha Chin community | 0  | 7 | 0 | 0.0078 | N/A |
| 17 | Migrant 4                           | 25 | F | Factory worker      | Ban Auea Arthorn Tha Chin community | 0  | 7 | 0 | 0.0074 | N/A |
| 18 | Migrant 5                           | 33 | M | Construction Worker | Ban Auea Arthorn Tha Chin community | 0  | 6 | 0 | 0.0060 | N/A |
| 19 | Migrant 6                           | 37 | M | Factory worker      | Ban Auea Arthorn Tha Chin community | 1  | 4 | 0 | 0.0048 | N/A |
| 20 | Central MOPH Staff                  | -  | - | -                   | -                                   | 4  | 0 | 0 | N/A    | 2.3 |
| 21 | Government Staff (Other Sectors)    | -  | - | -                   | -                                   | 3  | 0 | 0 | N/A    | 2.8 |
| 22 | Family/Friends in Myanmar           | -  | - | -                   | -                                   | 1  | 0 | 0 | N/A    | 2.7 |
| 23 | Broadcasting Media (National Media) | -  | - | -                   | -                                   | 10 | 0 | 0 | N/A    | 1.5 |
| 24 | Broadcasting Media (Local Media)    | -  | - | -                   | -                                   | 6  | 0 | 0 | N/A    | 1.8 |
| 25 | Broadcasting Media (Unspecified)    | -  | - | -                   | -                                   | 1  | 0 | 0 | N/A    | 3.7 |
| 26 | Printed Media (National Media)      | -  | - | -                   | -                                   | 5  | 0 | 0 | N/A    | 2   |
| 27 | Printed Media (Local Media)         | -  | - | -                   | -                                   | 10 | 0 | 0 | N/A    | 1.2 |
| 28 | Printed Media (Unspecified)         | -  | - | -                   | -                                   | 1  | 0 | 0 | N/A    | 3   |
| 29 | Online Media (National Media)       | -  | - | -                   | -                                   | 5  | 0 | 0 | N/A    | 2.3 |

|    |                               |   |   |   |   |    |   |   |     |     |
|----|-------------------------------|---|---|---|---|----|---|---|-----|-----|
| 30 | Online Media<br>(Local Media) | - | - | - | - | 12 | 0 | 0 | N/A | 1.3 |
| 31 | Online Media<br>(Unspecified) | - | - | - | - | 4  | 0 | 0 | N/A | 2   |
| 32 | International<br>Media        | - | - | - | - | 1  | 0 | 0 | N/A | 2.7 |
| 33 | Other channels                | - | - | - | - | 2  | 0 | 0 | N/A | 2.8 |

Note: KIs are node ID 1-19; Female (F); Male (M); Ban Auea Arthorn Tha Chin community, Tha Chin village, Tha Chin subdistrict
